# Supplementary material for: Social support, oral health knowledge, attitudes, practice, self-efficacy and oral health-related quality of life in Chinese college students
Source: PubMed Central journal article supplement (PMC10387080; doi:10.1038/s41598-023-39658-6), 2023-07-29
Supplement: 41598_2023_39658_MOESM1_ESM.pdf [file 41598_2023_39658_MOESM1_ESM.pdf]

**Table 1** The Constructed Items Measurement Model. (See end of article)

| Constructs/items                                                                                                           | Outer loading |
|----------------------------------------------------------------------------------------------------------------------------|---------------|
| <b>Social support (CR = 0.876, CA = 0.832, AVE = 0.543)</b>                                                                |               |
| There is a special person with whom I can share my joys and sorrows (SS1)                                                  | 0.718         |
| I have a special person who is a real source of comfort to me (SS2)                                                        | 0.708         |
| I get the emotional help and support I need from my family (SS3)                                                           | 0.708         |
| My family is willing to help me make decisions (SS4)                                                                       | 0.688         |
| I can count on my friends when things go wrong (SS5)                                                                       | 0.789         |
| I can talk about my problems with my friends (SS6)                                                                         | 0.803         |
| <b>Self-efficacy (CR = 0.921, CA = 0.905, AVE = 0.462)</b>                                                                 |               |
| I go to the dentist for treatment of periodontal disease (SE1)                                                             | 0.774         |
| I cooperate with my dentist and hygienist for treatment of periodontal disease (SE2)                                       | 0.824         |
| I visit my dentist regularly, even after treatment is completed, to prevent recurrence (SE3)                               | 0.785         |
| I have regular checkups even when I am busy with work or housework (SE4)                                                   | 0.750         |
| I have regular checkups even when my mind is not relaxed (SE5)                                                             | 0.785         |
| I brush my teeth as instructed (SE6)                                                                                       | 0.599         |
| I brush my teeth carefully and thoroughly (SE7)                                                                            | 0.623         |
| I brush the border between the teeth and gums (SE8)                                                                        | 0.671         |
| I move the toothbrush with a short, quick motion (SE9)                                                                     | 0.736         |
| I take time to brush my teeth carefully (SE10)                                                                             | 0.740         |
| I try not to spend too much time eating (SE11)                                                                             | 0.323         |
| I eat my meals at fixed times during the day (SE12)                                                                        | 0.563         |
| I try to eat a well-balanced diet (SE13)                                                                                   | 0.641         |
| I try not to eat too many sweets (SE14)                                                                                    | 0.524         |
| <b>Knowledge (CR = 0.944, CA = 0.929, AVE = 0.739)</b>                                                                     |               |
| Plaque can cause tooth decay and periodontal disease, including gingivitis and periodontitis (K1)                          | 0.86          |
| Fluoride toothpaste can prevent caries (K2)                                                                                | 0.847         |
| A regular dental deep cleaning using the ultrasonic dental scaler can maintain good oral hygiene (K4)                      | 0.878         |
| In the early stages of gingivitis, the gums bleed when brushing or biting hard objects (K5)                                | 0.9           |
| Caries are often characterized by irritation, biting discomfort or pain (K7)                                               | 0.898         |
| Halitosis is mainly caused by oral diseases (K8)                                                                           | 0.765         |
| <b>Attitude (CR = 0.895, CA = 0.844, AVE = 0.681)</b>                                                                      |               |
| Do you think eating sweets (such as cakes, biscuits and juices) will not cause tooth decay? (A1)                           | 0.797         |
| Do you think eating carbonated drinks will not cause tooth decay? (A2)                                                     | 0.757         |
| Do you think regular cleaning is good for oral health? (A3)                                                                | 0.869         |
| Do you think oral diseases can be prevented? (A4)                                                                          | 0.873         |
| <b>Practice (CR = 0.883, CA = 0.847, AVE = 0.485)</b>                                                                      |               |
| Do you brush your teeth more than twice a day? (P1)                                                                        | 0.606         |
| Is your brushing time $\geq 3$ min each time? (P2)                                                                         | 0.737         |
| Do you often use fluoride toothpaste? (P3)                                                                                 | 0.682         |
| Do you think regular oral check-ups are good for oral health? (P4)                                                         | 0.62          |
| Do you change a toothbrush every three months? (P5)                                                                        | 0.731         |
| Do you often use dental floss (or an interdental brush) to help clean your teeth? (P6)                                     | 0.683         |
| Is your brushing method recommended by the Chinese association of stomatology as "horizontal vibrating brush method"? (P7) | 0.772         |
| Do you often gargle after meals? (P8)                                                                                      | 0.726         |
| <b>OHRQoL (CR = 0.976, CA = 0.873, AVE = 0.748)</b>                                                                        |               |
| Have you had trouble pronouncing any words because of problems with your teeth, mouth or dentures? (I1)                    | 0.825         |
| Have you felt that your sense of taste has worsened because of problems with your teeth, mouth or dentures? (I2)           | 0.854         |
| Have you had painful aching in your mouth? (I3)                                                                            | 0.589         |
| Have you found it uncomfortable to eat any foods because of problems with your teeth, mouth or dentures? (I4)              | 0.81          |
| Have you been self-conscious because of your teeth, mouth or dentures? (I5)                                                | 0.826         |
| Have you felt tense because of problems with your teeth, mouth or dentures? (I6)                                           | 0.876         |
| Has your diet been unsatisfactory because of problems with your teeth, mouth or dentures? (I7)                             | 0.894         |
| Have you had to interrupt meals because of problems with your teeth, mouth or dentures? (I8)                               | 0.896         |
| Have you found it difficult to relax because of problems with your teeth, mouth or dentures? (I9)                          | 0.918         |
| Have you been a bit embarrassed because of problems with your teeth, mouth or dentures? (I10)                              | 0.887         |
| Have you been a bit irritable with other people because of problems with your teeth, mouth or dentures? (I11)              | 0.921         |
| Have you had difficulty doing your usual jobs because of problems with your teeth, mouth or dentures? (I12)                | 0.934         |
| Have you felt that life in general was less satisfying because of problems with your teeth, mouth or dentures? (I13)       | 0.92          |
| Have you been totally unable to function because of problems with your teeth, mouth or dentures? (I14)                     | 0.903         |

SS, social support; SE, social efficacy; K, knowledge; A, attitude; P, practice
